# Supplementary material for: Catalytic ketonization of palmitic acid over a series of transition metal oxides supported on zirconia oxide-based catalysts
Source: Royal Society of Chemistry journal article supplement (doi:10.1039/d0ra10963k), 2021-01-01
Supplement: d0ra10963k1.pdf [file d0ra10963k1.pdf]

## Supplementary Material (ESI) for RSC Advances

### Catalytic ketonization of palmitic acid over a series of transition metal oxides supported on zirconia oxide-based catalysts

S. A. Aleem<sup>1,2,3</sup>, N. Asikin-Mijan<sup>1,2</sup>, A.S. Hussain<sup>3</sup>, C.H. Voon<sup>3</sup>, A. Dolfi<sup>6</sup>, S. Sivasangar<sup>1,5\*</sup>, Y.H. Taufiq-Yap<sup>1,2,4\*</sup>

<sup>1</sup>*Catalysis Science and Technology Research Centre (PutraCAT); Faculty of Science, Universiti Putra Malaysia, 43400 UPM Serdang, Selangor, Malaysia*

<sup>2</sup>*Department of Chemistry, Faculty of Science, Universiti Putra Malaysia, 43400, UPM Serdang, Selangor, Malaysia*

<sup>3</sup>*PETRONAS Research Sdn Bhd, Kawasan Institusi Bangi, Kajang, 43000 Selangor, Malaysia.*

<sup>4</sup>*Faculty of Science and Natural Resources, Universiti Malaysia Sabah, 88400, Kota Kinabalu, Sabah*

<sup>5</sup>*Department of Science and Technology, Faculty of Humanities, Management & Science, Universiti Putra Malaysia Kampus Bintulu, Jalan Nyabau, Peti Surat 396, 97008 Bintulu, Sarawak*

<sup>6</sup> *PETRONAS Research Turin, Trinità 82, 10026 Santena (Turin), Italy*

#### Table of Content

|                                                                                                                |   |
|----------------------------------------------------------------------------------------------------------------|---|
| 1. Reactor set up for ketonization reaction .....                                                              | 2 |
| 2. TEM Result of fresh MnO <sub>2</sub> /ZrO <sub>2</sub> .....                                                | 3 |
| 3. XPS Spectra of MnO <sub>2</sub> /ZrO <sub>2</sub> catalyst (A) Wide Scan (B) Zr 3d (C) Mn 2p (D) O 1s ..... | 3 |
| 4. FESEM/EDX Result of spent MnO <sub>2</sub> /ZrO <sub>2</sub> .....                                          | 5 |
| 5. References .....                                                                                            | 6 |

## 1. Reactor set up for ketonization reaction

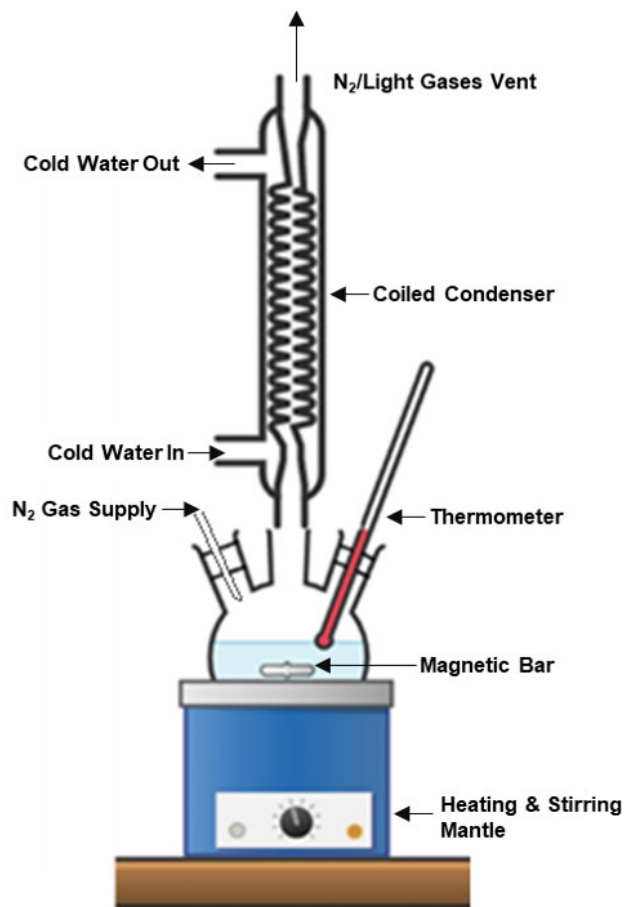

**Fig. 1S** Reactor set-up for ketonization reaction.

## 2. TEM Result of fresh $\text{MnO}_2/\text{ZrO}_2$

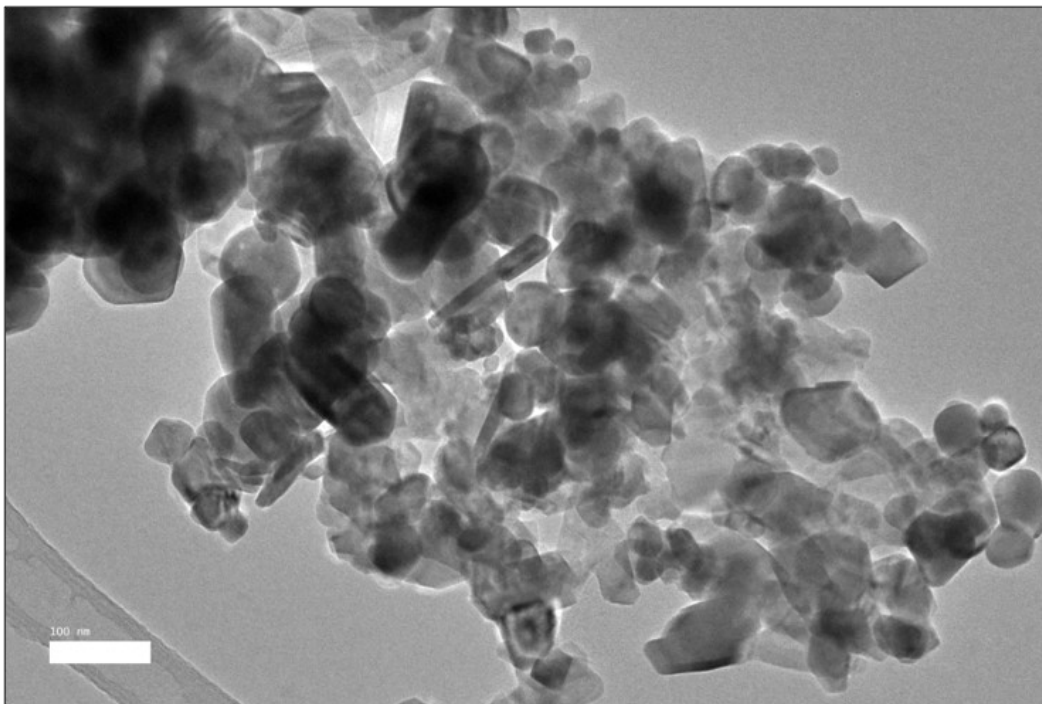

**Fig. 2S** TEM image of  $\text{MnO}_2/\text{ZrO}_2$  catalyst

## 3. XPS Spectra of $\text{MnO}_2/\text{ZrO}_2$ catalyst (A) Wide Scan (B) Zr 3d (C) Mn 2p (D) O 1s

In this study, XPS was used to analyse the surface properties of  $\text{MnO}_2/\text{ZrO}_2$  catalyst and the XPS results are shown in **Fig. 3S**. The XPS results shows the wide scan survey of the catalyst, showing the peaks for Zr, O, Mn and C as the reference peak at 285eV.<sup>1</sup> For Zr, it is well known that the Zr 3d spectrum is a doublet Zr  $3d_{5/2}$ -Zr  $3d_{3/2}$ . From **Fig. 3S**, the deconvoluted Zr spectra shows  $\text{ZrO}_2$  3d spin-orbit doublet peaks at ~182eV and ~184eV that respectively corresponds to the  $\text{ZrO}_2$   $3d_{5/2}$  and  $\text{ZrO}_2$   $3d_{3/2}$ , and this agrees very well in the literature.<sup>1</sup> The integral intensities of both peaks is roughly 3:2 in ratio and the spin energy gap between the peak is ~2.2 eV, which closely corroborates the findings from previous studies.<sup>2,3</sup> Further analysis of the spectra shows a few other peaks which are from the doublet peaks of Zr metal at ~179eV and ~181eV corresponding to the Zr  $3d_{5/2}$ -Zr  $3d_{3/2}$ .<sup>4</sup>

For Mn (**Fig. 3S (C)**), it can be seen by the deconvolution of Mn 2p photoelectron spectrum that the high-resolution Mn2p spectrum of the Mn doped  $\text{ZrO}_2$  catalyst consists of two main peaks of the spin-orbit

couplet. The low binding energy peak at and the high binding energy peak (641.1 eV and 652.2 eV) corresponds to photoelectron states  $\text{MnO}_2$   $2p_{3/2}$  states and  $\text{MnO}_2$   $2p_{1/2}$  <sup>5,6</sup>. These values match well with the literature values from previous literature as well as NIST Handbook and it is exciting to note that spin energy gap is 11.1 similar to findings by Castillo et al. (2020).<sup>2</sup> The manganese 2p peak was deconvoluted into two other components in small amounts which are components as  $\text{Mn}^{3+}$  corresponding to  $\text{Mn}_2\text{O}_3$  and Mn at binding energies of  $\sim 643\text{eV}$  and  $\sim 638.8\text{ eV}$  <sup>7,8</sup>.

Scrutinizing the O 1s spectra complements the finding from Zr 3d and Mn 2p spectra. The deconvolution of O 1s spectrum resulted in the observation of Zr-O bond at binding energy of  $\sim 529.4\text{eV}$  and Mn-O bond at binding energy of  $\sim 529.8$  corresponding to  $\text{ZrO}_2$  and  $\text{MnO}_2$  respectively. <sup>6,9</sup> From these findings, it can be concluded that  $\text{MnO}_2$  is the largest constituent of the Mn species on the catalyst surface as tested by XPS.

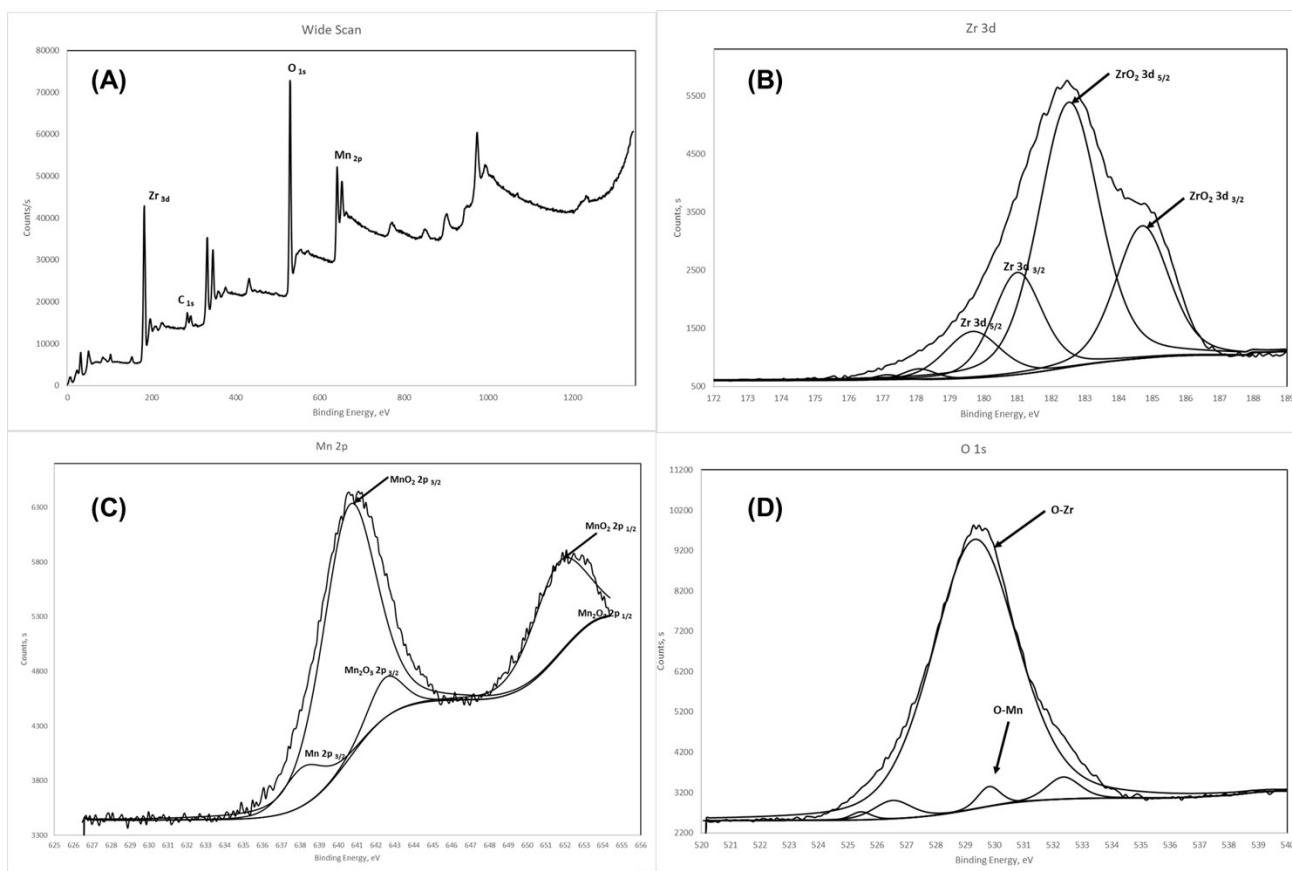

**Fig. 3S** XPS Spectra of  $\text{MnO}_2/\text{ZrO}_2$  catalyst (A) Wide Scan (B) Zr 3d (C) Mn 2p (D) O 1s

#### 4. FESEM/EDX Result of spent $\text{MnO}_2/\text{ZrO}_2$

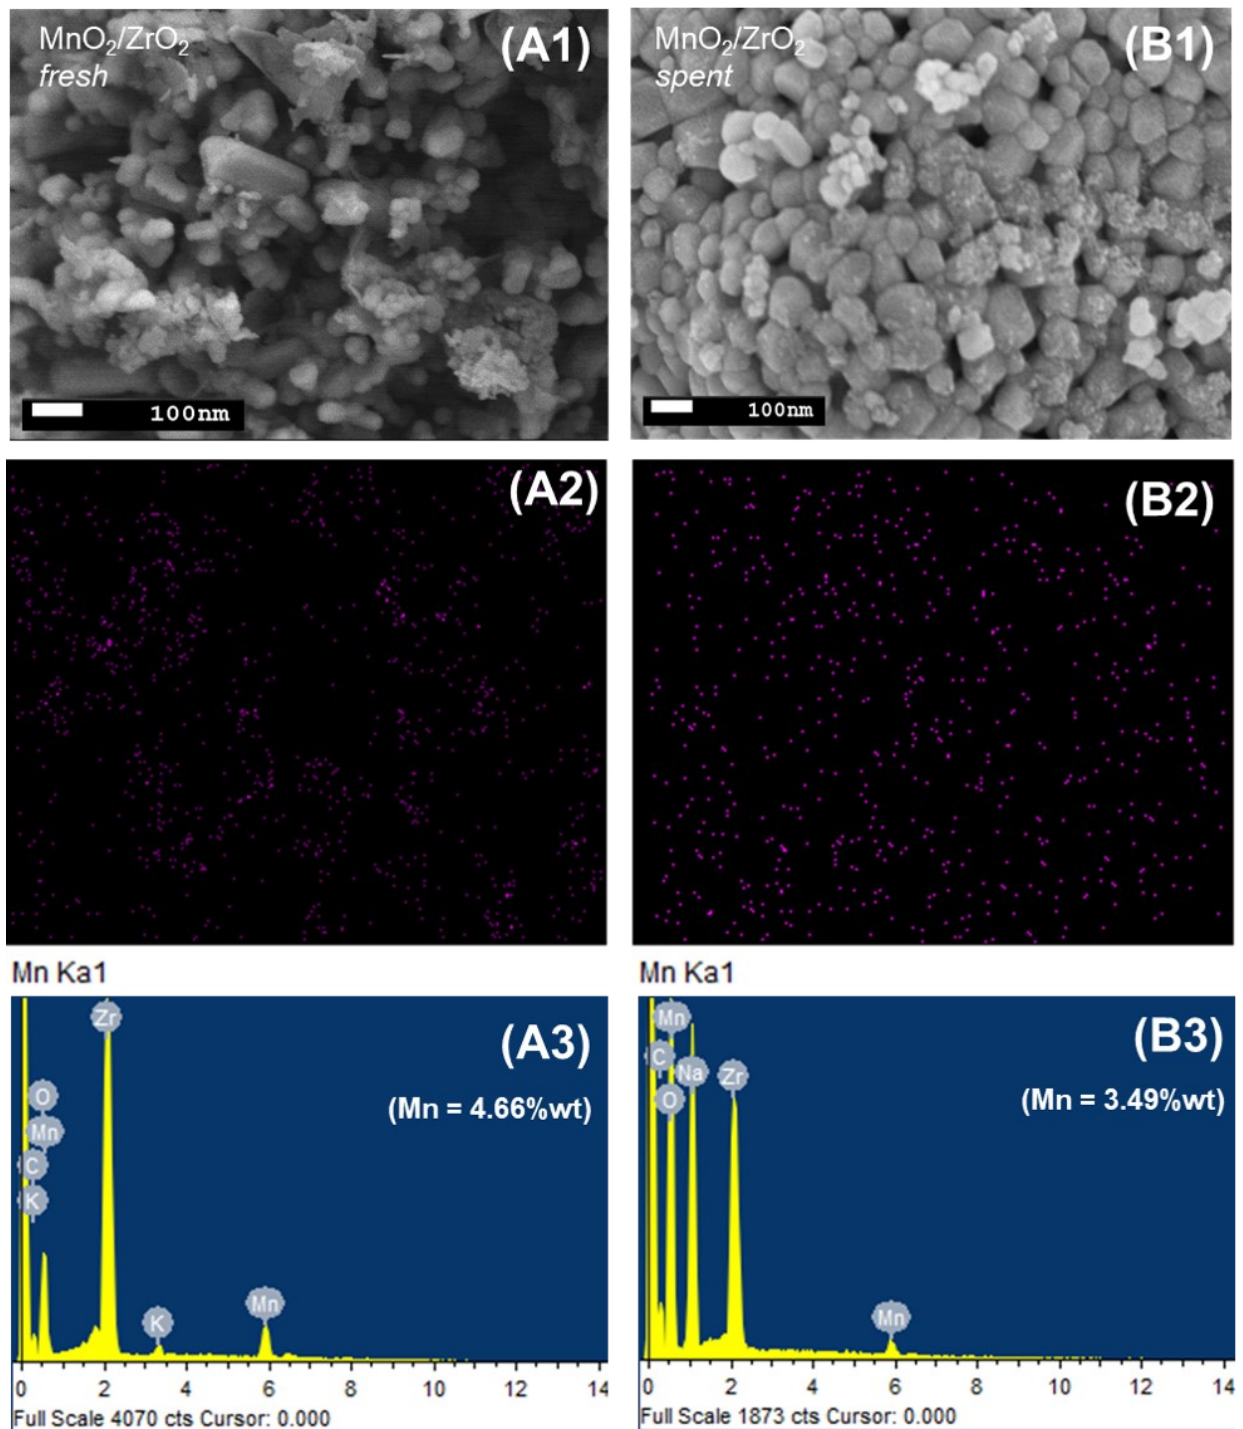

**Fig. 4S** (A1) FESEM of fresh catalyst, (A2) Elemental dot mapping of Mn in fresh  $\text{MnO}_2/\text{ZrO}_2$  (A3) Elemental mapping spectra of fresh  $\text{MnO}_2/\text{ZrO}_2$  (B1) FESEM of spent  $\text{MnO}_2/\text{ZrO}_2$  catalyst (B2) Elemental dot mapping of Mn in spent  $\text{MnO}_2/\text{ZrO}_2$  (B3) Elemental mapping spectra of spent  $\text{MnO}_2/\text{ZrO}_2$  catalyst

## 5. References

- 1 S. R. Teeparthi, E. W. Awin and R. Kumar, *Sci. Rep.*, 2018, 1–12.
- 2 R. C. S. Castillo and N. N. R. Zanella, *Top. Catal.*, 2020, **63**, 481–491.
- 3 O. A. Bulavchenko, Z. S. Vinokurov, T. N. Afonassenko and P. G. Tsyrl, 2015, 15499–15507.
- 4 S. Sinha, S. Badrinarayanan and A. P. B. Sinha, *J. Less-Common Met.*, 1987, **134**, 229–236.
- 5 P. E. Sobol and J. Chastain, .
- 6 M. Oku, K. Hirokawa and S. Ikeda, *J. Electron Spectros. Relat. Phenomena*, 1975, **7**, 465–473.
- 7 C. E. Myers, H. F. Franzen and J. W. Anderegg, *Inorg. Chem.*, 1985, **24**, 1822–1824.
- 8 Y. Umezawa and C. N. Rellley, *Anal. Chem.*, 1978, **50**, 1290–1295.
- 9 D. D. Sarma and C. N. R. Rao, *J. Electron Spectros. Relat. Phenomena*, 1980, **20**, 25–45.
